# Supplementary material for: Alterations of the Intestinal Permeability are Reflected by Changes in the Urine Metabolome of Young Autistic Children: Preliminary Results
Source: MDPI journal article supplement (doi:10.3390/metabo12020104), 2022-01-23
Supplement: s1 [file s1]

*Alteration of the Intestinal Permeability are Reflected by Changes in the  
Urine Metabolome of Young Autistic Children  
Supplementary materials*

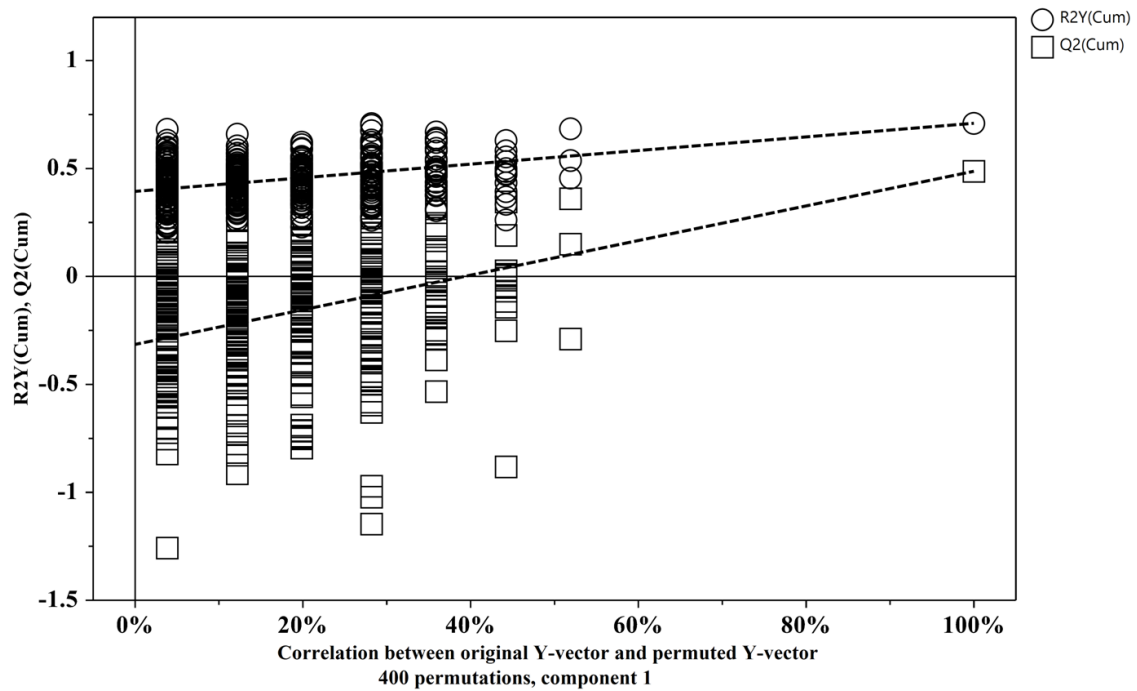

**Figure S1.** Validation plots of OPLS-DA model by using a permutation test. The horizontal axis shows the correlation between the permuted and actual data, while the vertical axis displays the cumulative values of  $R^2$  and  $Q^2$ . The intercept gives an estimate of the overfitting phenomenon.

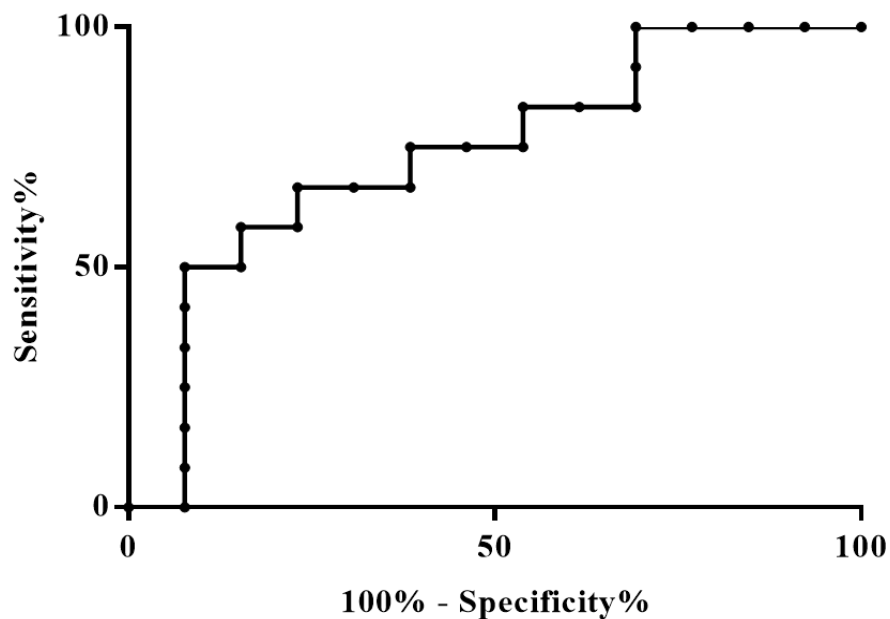

**Figure S2.** Receiver Operating Characteristic (ROC) plot built by combining all significantly altered metabolites between ASD children and their US. Area under the curve (AUC) = 0.737,  $p = 0.04$

*Alteration of the Intestinal Permeability are Reflected by Changes in the  
Urine Metabolome of Young Autistic Children  
Supplementary materials*

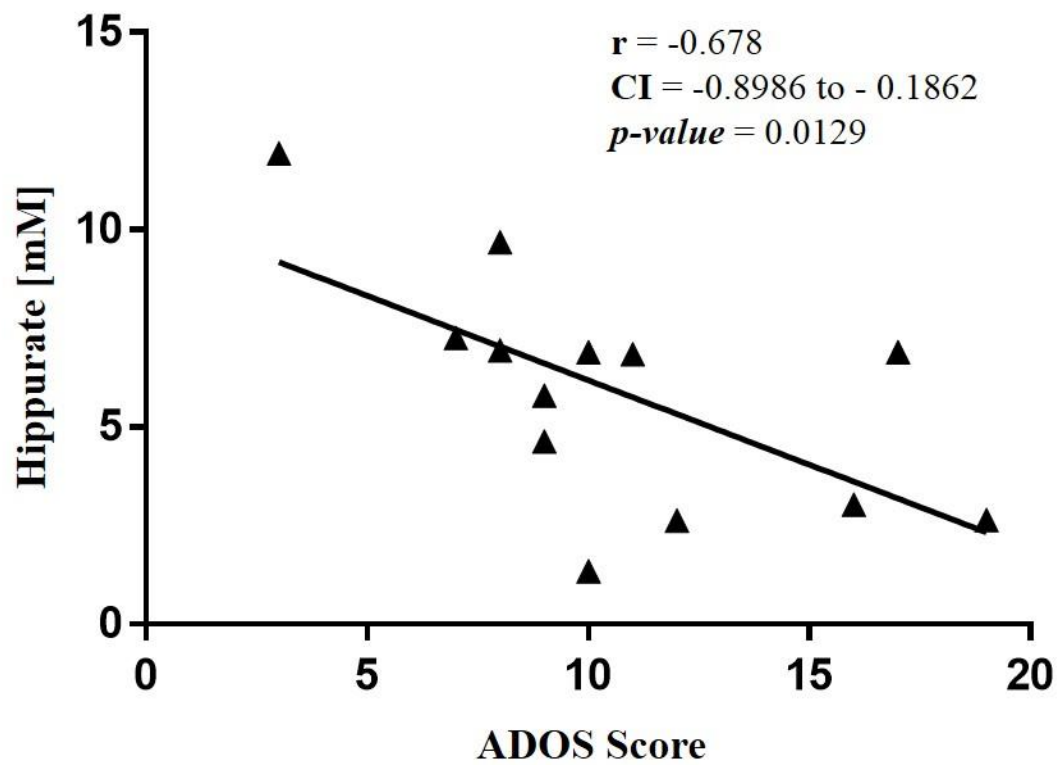

**Figure S3.** Inverse Spearman's correlation plot between urine hippurate abundance and the ADOS-2 CSS score in the group of autistic children (n=13)
